# Supplementary material
Source: publisher site journal article supplement (https://www.dovepress.com/get_supplementary_file.php?f=299381.xlsx)
Supplement: Supplementary file 1 [file get_supplementary_file.php]

## Sheet: Supplementary Table 1
Supplementary Table 1. List of genes in our panel
ABL1	CCNE1	ERBB3	GNAS	MAP2K1	NRG1	RB1
AKT1	CD274	ERBB4	HRAS	MDM2	NTRK1	RET
ALK	CDH1	ESR1	IDH1	MET	NTRK2	RICTOR
APC	CDK4	EZH2	IDH2	MLH1	NTRK3	ROS1
ARAF	CDK6	FBXW7	JAK1	MTOR	PDGFRA	SMAD4
ATM	CDKN2A	FGFR1	JAK2	MYC	PDGFRB	SMO
BRAF	CTNNB1	FGFR2	JAK3	NF1	PIK3CA	STK11
BRCA1	DDR2	FGFR3	KDR	NFE2L2	PTCH1	TERT
BRCA2	EGFR	FLT3	KIT	NOTCH1	PTEN	TP53
CCND1	ERBB2	FLT4	KRAS	NRAS	RAF1	TSC1
TSC2	VEGFA	VHL

## Sheet: Supplementary Table 2
Supplementary Table 2. List of fusion genes and their hotspot introns covered in our panel
ALK	BRAF	BRCA1
intron 1, 4, 16, 18, 19	intron 7-9	intron 12
BRCA2	EGFR	FGFR1
intron 2	intron 3, 17	intron 1, 2
FGFR2	FGFR3	NTRK1
intron 6, 17	intron 5, 6, 7, 17	intron 8, 9, 10
NTRK2	NTRK3	RET
intron 12	intron 12, 14	intron 7-11
ROS1
intron 31-35

## Sheet: Supplementary Table 3
Supplementary Table 3. Confirmed INDELs in cancer cell line sample RL952
Gene	CHROM	POS	REF	ALT	Type	cDNA_change	Protein_Change	Confired AF
JAK1	chr1	65305356	CT	C	frame_shift_del	c.2771delA	p.K924fs	0.5
JAK1	chr1	65306996	GT	G	frame_shift_del	c.2580delA	p.K860fs	0.462
NTRK1	chr1	156848967	G	GC	frame_shift_ins	c.1859_1860insC	p.G620fs	0.472
BRAF	chr7	140482926	AG	A	frame_shift_del	c.1208delC	p.P403fs	0.472
PTEN	chr10	89720811	CA	C	frame_shift_del	c.963delA	p.T321fs	0.493
PTEN	chr10	89720811	C	CA	frame_shift_ins	c.962_963insA	p.T321fs	0.473
CCND1	chr11	69466025	C	CCGACGTGCGGGA	in_frame_ins	c.863_864insCGACGTGCGGGA	p.T288_D289insDVRD	0.328
ATM	chr11	108172509	GA	G	frame_shift_del	c.5313delA	p.R1771fs	0.475
BRCA2	chr13	32912770	A	AT	frame_shift_ins	c.4278_4279insT	p.F1427fs	0.449
BRCA2	chr13	32913952	C	CA	frame_shift_ins	c.5460_5461insA	p.K1821fs	0.46
TP53	chr17	7578194	GCAC	G	in_frame_del	c.652_654delGTG	p.V218del	0.564
TP53	chr17	7579470	CG	C	frame_shift_del	c.216delC	p.P72fs	0.353
CD3EAP	chr19	45912733	A	AAGC	in_frame_ins	c.1513_1514insAGC	p.K505_Q506insQ	0.428

## Sheet: Supplementary Table 4
Supplementary Table 4. The detailed validation results of variants (SNV, INDEL, CNV and fusion) in the reference standard sample HD753 at the sequencing depth of 500X
SNV
Gene	Variant	Confirmed AF	Detected AF
BRAF	V600E	0.182	0.1744
EGFR	G719S	0.053	0.0466
KRAS	G13D	0.056	0.0435
NOTCH1	P668S	0.05	0.052
PIK3CA	E545K	0.056	0.0472
INDEL
Gene	Variant	Confirmed AF	Detected AF
BRCA2	A1689fs	0.056	0.0712
EGFR	V769_D770insASV	0.056	0.0434
EGFR	E746_A750del	0.053	0.02
FBXW7	G667fs	0.056	0.0651
FLT3	S985fs	0.056	0.0631
MET	V237fs	0.025	0.0287
CNV
Gene	Confirmed CNV	Detected CNVs
MET	4.5 copies	4 .0 copies
MYC	9.5 copies	7.8 copies
Fusion
Gene Pair	Confirmed AF	Detected AF
SLC34A2-ROS1	0.056	0.052
CCDC6-RET	0.05	0.048

## Sheet: Supplementary Table 5
Supplementary Table 5. The intra-run reproducibility validation results
Sample	Variant	Variant type	Technician 1 detected_AF	Technician 2 detected_AF	Technician 3 detected_AF	Reproducibility
EQA 1	ALK-EML4 fusion	Fusion	0.095	0.093	0.146	1
EQA 2	ERBB2 gain	CNV	9.0 copies	9.1 copies	9.0 copies	1
EQA 3	EGFR p.L747_T751del	INDEL	0.076	0.06	0.068	1
	EGFR p.T790M	SNV	0.139	0.151	0.139	1
EQA 4	KRAS p.G12C	SNV	0.018	0.013	0.01	1
EQA 5	EGFR p.L747_T751del	INDEL	0.0144	0.023	0.016	1

## Sheet: Supplementary Table 6
Supplementary Table 6. The inter-run reproducibility validation results
Sample	Variant	Variant type	Run 1 detected_AF	Run 2 detected_AF	Run 3 detected_AF	Reproducibility
EQA 1	ALK-EML4 fusion	Fusion	0.095	0.118	0.096	1
EQA 2	ERBB2 gain	CNV	9.0 copies	8.2 copies	9.0 copies	1
EQA 3	EGFR p.L747_T751del	INDEL	0.076	0.066	0.061	1
	EGFR p.T790M	SNV	0.139	0.148	0.146	1
EQA 4	KRAS p.G12C	SNV	0.018	0.02	0.011	1
EQA 5	EGFR p.L747_T751del	INDEL	0.0144	0.013	0.013	1
